# Supplementary material for: Determinants of Obesity-Related Kidney Dysfunction Remission after Bariatric Surgery
Source: Research Square preprint supplement (doi:10.21203/rs.3.rs-6415243/v1), 2025-05-07
Supplement: Supplementary file 2 [file 92d3e448ca190ae535acbcb7.docx]

**Supplementary Data**

**Supplementary Table 1.** Pre-Surgery Clinical and Biochemical Factors Associated with Proteinuria Variation.

|  | **HR (CI) Pre** | **p-value Pre** |
| --- | --- | --- |
| Body Weight (kg) | 0.105 (-0.383-0.592) | 0.666 |
| BMI, (kg/m²) | -0.274 (-1.520-0.972) | 0.659 |
| Serum Creatinine (mg/dL) | -14.280 (-77.793-49.233) | 0.651 |
| CKD-EPI (mL/min/1.73 m²) | 0.384 (-0.347-1.114) | 0.294 |
| Serum Urea (mg/dL) | -0.982 (-2.301-0.337) | 0.140 |
| Uric Acid (mg/dL) | 1.072 (-9.120-11.264) | 0.832 |
| Serum Glucose (mg/dL) | 0.346 (-0.086-  0.778) | 0.113 |
| HbA1C (%) | 9.888 (-12.510-14.486) | 0.883 |
| Total Cholesterol (mg/dL) | -0.160 (-0.499-0.179) | 0.345 |
| LDL Cholesterol (mg/dL) | 0.263 (-0.595-0.070) | 0.118 |
| VLDL Cholesterol (mg/dL) | 0.634 (-0.338-1.607) | 0.194 |
| HDL Cholesterol (mg/dL) | 0.131 (-1.070-1.331) | 0.827 |
| Triglycerides (mg/dL) | 0.127 (-0.068-0.321) | 0.194 |
| Total Bilirubin (mg/dL) | -7.580 (-53.596-38.436) | **<0.05** |
| AST (U/L) | 0.597 (-0.593-1.786) | 0.316 |
| Gamma-GT (U/L) | 0.148 (-0.260-0.555) | 0.468 |
| Alkaline Phosphatase (U/L) | 0.355 (-0.193-0.903) | 0.198 |
| Total Protein (g/dL) | 11.979 (-17.768-41.726) | 0.420 |
| Albuminuria (mg/day) | 0.016 (-0.010-0.041) | 0.223 |
| Proteinuria (mg/day) | 0.010 (-0.006-0.025) | 0.204 |
| Rate of Albuminuria (%) | 0.057 (-0.546-0.660) | 0.849 |

Note: Values in bold indicate statistically significant results (p-value < 0.05).

**Abbreviations:** BMI, Body Mass Index; CKD-EPI, Chronic Kidney Disease Epidemiology Collaboration Equation; HbA1C, Glycated Hemoglobin; HDL, High-Density Lipoprotein; LDL, Low-Density Lipoprotein; VLDL, Very Low-Density Lipoprotein; AST, Aspartate Aminotransferase; Gamma-GT, Gamma-Glutamyl Transferase.

**Supplementary Table 2.** Pre-Surgery Clinical and Biochemical Factors Associated with Albuminuria Variation.

|  | **HR (CI)** | **p-value** |
| --- | --- | --- |
| Body Weight (kg) | 0.455 (-0.662-1.553) | 0.419 |
| BMI (kg/m²) | -0.020 (-2.886-2.846) | 0.989 |
| Serum Creatinine (mg/dL) | -111.146 (-252.476-30.185) | 0.119 |
| CKD-EPI (mL/min/1.73 m²) | 1.419 (-0.224-3.063) | 0.088 |
| Serum Urea (mg/dL) | -1.642 (-4.755-1.471) | 0.291 |
| Uric Acid (mg/dL) | 7.481 (-16.413-31.375) | 0.529 |
| Serum Glucose (mg/dL) | 0.323 (- 0.703-1.349) | 0.526 |
| HbA1C (%) | 9.801 (-20.958-40.560) | 0.521 |
| Total Cholesterol (mg/dL) | -0.107 (-0.911-0.698) | 0.789 |
| HDL Cholesterol (mg/dL) | -0.818 (-3.610-1.974) | 0.555 |
| LDL Cholesterol (mg/dL) | -0.021 (-0.813-0.771) | 0.957 |
| VLDL Cholesterol (mg/dL) | -0.273 (-2.979-2.433) | 0.838 |
| Triglycerides (mg/dL) | -0.055 (-0.596-0.487) | 0.838 |
| Total Bilirubin (mg/dL) | -16.758 (-122.874-89.357) | 0.750 |
| AST (U/L) | 0.422 (-2.420-3.263) | 0.765 |
| Gamma- GT (U/L) | -0.065 (-1.011-0.880) | 0.889 |
| Alkaline Phosphatase (U/L) | 0.705 (-0.569-1.980) | 0.269 |
| Total Serum Proteins (g/dL) | -17.414 (-87.709-52.881) | 0.618 |
| Microalbuminuria (mg/day) | 0.032 (-0.026-0.091) | 0.268 |
| Proteinuria (mg/day) | 0.016 (-0.019-0.051) | 0.366 |
| %EBWL (%) | 0.370 (-1.028-1.768) | 0.593 |
| Rate of Albuminuria ( %) | **1.979 (0.686-3.272)** | **<0.05** |

Note: Values in bold indicate statistically significant results (p-value < 0.05).

**Abbreviations:** BMI, Body Mass Index; CKD-EPI, Chronic Kidney Disease Epidemiology Collaboration Equation; HbA1C, Glycated Hemoglobin; HDL, High-Density Lipoprotein; LDL, Low-Density Lipoprotein; VLDL, Very Low-Density Lipoprotein; AST, Aspartate Aminotransferase; Gamma-GT, Gamma-Glutamyl Transferase.

**Supplementary Table 3.** Pre-Surgery Clinical and Biochemical Factors Associated with CKD-EPI Variation.

|  | **HR (CI)** | **p-value** |
| --- | --- | --- |
| Body Weight (kg) | -0.020 (-0.139-0.099) | 0.733 |
| Body Mass Index ( kg/m²) | -0.023 (-0.320-0.274) | 0.876 |
| Fasting Glucose (mg/dL) | 0.00 (-0.107-0.107) | 0.996 |
| HbA1C (%) | 0.823 (-2.395-4.041) | 0.607 |
| Urea (mg/dL) | -0.200 (-0.587-0.187) | 0.301 |
| Uric Acid (mg/dL) | 0.725 (-1.777-3.226) | 0.560 |
| Triglycerides (mg/dL) | 0.037 (-0.010-0.083) | 0.119 |
| Total Bilirubin (mg/dL) | -4.783 (-15.638-6.073) | 0.377 |
| Microalbuminuria (mg/day) | 0.000 (-0.006-0.006) | 0.934 |
| Proteinuria (mg/day) | 0.00 (-0.003-0.004) | 0.896 |
| %EBWL (%) | -0.043 (-0.145-0.059) | 0.398 |

Note: Values in bold indicate statistically significant results (p-value < 0.05).

**Abbreviations:** BMI, Body Mass Index; CKD-EPI, Chronic Kidney Disease Epidemiology Collaboration Equation; HbA1C, Glycated Hemoglobin; HDL, High-Density Lipoprotein; LDL, Low-Density Lipoprotein; VLDL, Very Low-Density Lipoprotein; AST, Aspartate Aminotransferase; Gamma-GT, Gamma-Glutamyl Transferase.

**Supplementary Table 4.** Pre-Surgery Clinical and Biochemical Factors Associated with Variation in the Rate of Albuminuria.

|  | **Univariate** | | **Multivariate** | |
| --- | --- | --- | --- | --- |
| **Variable** | **HR (CI)** | **p-value** | **HR (CI)** | **p-value** |
| Body Weight (kg) | -0.195 (-0.417-0.027) | 0.083 | - | - |
| Body Mass Index (kg/m²) | -0.066 (-0.660-0.528) | 0.822 | - | - |
| Fasting Glucose (mg/dL) | -0.081 (-0.293-0.132) | 0.445 | - | - |
| HbA1C (%) | -2.774 (-9.122-  3.575) | 0.380 | - | - |
| Serum Creatinine (SCr, mg/dL) | 14.988 (-14.991-44.968) | 0.316 | - | - |
| CKD-EPI (mL/min/1.73 m²) | **-0.338 (-0.674 - -0.001)** | **<0.05** | -0.126 (-0.478-0.226) | 0.470 |
| Uric Acid (mg/dL) | **-4.888 (-9.567 - -0.209)** | **<0.05** | -3.440 (-7.902-1.021) | 0.126 |
| Total Cholesterol (mg/dL) | **-0.177 (-0.332 - -0.022)** | **<0.05** | 0.135 (-0.276-0.546) | 0.507 |
| LDL Cholesterol (LDL, mg/dL) | **-0.217 (-0.362 - -0.072)** | **<0.05** | -0.298 (-0.720-0.124) | 0.160 |
| Total Bilirubin (mg/dL) | 11.312 (-10.377-33.001) | 0.296 | - | - |

Note: Values in bold indicate statistically significant results (p-value < 0.05).

**Abbreviations:** BMI, Body Mass Index; CKD-EPI, Chronic Kidney Disease Epidemiology Collaboration Equation; HbA1C, Glycated Hemoglobin; HDL, High-Density Lipoprotein; LDL, Low-Density Lipoprotein; VLDL, Very Low-Density Lipoprotein; AST, Aspartate Aminotransferase; Gamma-GT, Gamma-Glutamyl Transferase.

**Supplementary Table 5.** Pre-Surgery Clinical and Biochemical Factors Associated with Proteinuria>150 mg/day 2 years after surgery.

| **Variable** | **HR (CI)** | **p-value** |
| --- | --- | --- |
| Body Weight (kg) | 1.002 (0.973-1.031) | 0.901 |
| Body Mass Index (kg/m²) | 1.039 (0.953-1.133) | 0.386 |
| Hypertension | 0.450 (0.104-1.954) | 0.286 |
| Dyslipidemia | 2.444 (0.437-13.672) | 0.309 |
| Fasting Glucose (mg/dL) | 0.970 (0.916-1.026) | 0.289 |
| HbA1C (%) | 0.672 (0.216-2.086) | 0.492 |
| Serum Creatinine (SCr, mg/dL) | 0.029 (0.000-95.210) | 0.392 |
| CKD-EPI (mL/min/1.73 m²) | 1.035 (0.978-1.096) | 0.233 |
| Uric Acid (mg/dL) | 0.887 (0.473-1.660) | 0.707 |
| Total Cholesterol (mg/dL) | 1.006 (0.985-1.027) | 0.581 |
| HDL Cholesterol (mg/dL) | 0.960 (0.886-1.039) | 0.312 |
| LDL Cholesterol (mg/dL) | 1.012 (0.990-1.034) | 0.286 |
| VLDL Cholesterol (mg/dL) | 0.980 (0.920-1.045) | 0.544 |
| Triglycerides (mg/dL) | 0.996 (0.983-1.009) | 0.544 |
| Total Bilirubin (mg/dL) | 0.186 (0.004-8.711) | 0.391 |
| AST (U/L) | 1.003 (0.993-1.079) | 0.927 |
| Gamma- GT (U/L) | 0.994 (0.966-1.022) | 0.651 |
| Alkaline Phosphatase (U/L) | 0.975 (0.940-1.011) | 0.174 |
| Total Serum Proteins (g/dL) | 0.361 (0.045-2.912) | 0.339 |
| %EBWL (%) | 1.023 (0.993-1.054) | 0.13 |

**Abbreviations:** BMI, Body Mass Index; CKD-EPI, Chronic Kidney Disease Epidemiology Collaboration Equation; HbA1C, Glycated Hemoglobin; HDL, High-Density Lipoprotein; LDL, Low-Density Lipoprotein; VLDL, Very Low-Density Lipoprotein; AST, Aspartate Aminotransferase; Gamma-GT, Gamma-Glutamyl Transferase.
